# Supplementary material for: Evolutionary Divergence between Toona ciliata and Toona sinensis Assayed with Their Whole Genome Sequences
Source: MDPI journal article supplement (doi:10.3390/genes13101799), 2022-10-05
Supplement: s1 [file s1]

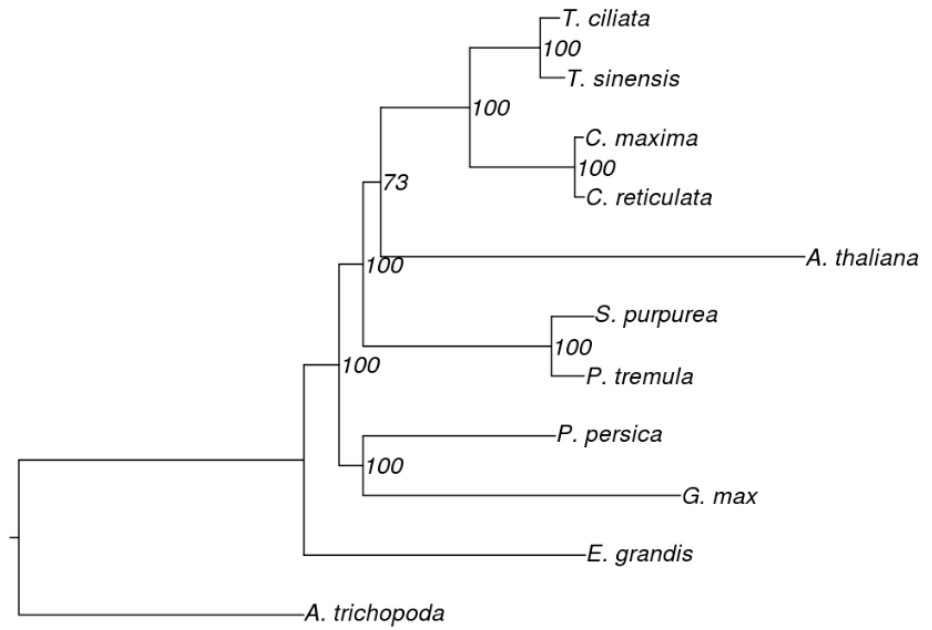

**Figure S1.** A phylogeny of 11 species based on 1276 single copy genes. It was constructed using IQ-TREE v1.6.11 software [1] MAFFT v7.205 [2] was used to compare the sequence of each single copy gene family, and then the PAL2NAL V14 [3] program was used to convert the compared protein sequence into codon alignment. Subsequently, gblocks v0.91b [4] was used to remove regions with poor sequence alignment or large differences. Finally, all well aligned gene family sequences of each species were catenated to obtain a super gene. Then, the model detection tool ModelFinder [5] provided by IQ-TREE was used for model detection, and the best model was obtained as jtt+f+i+g4. Then, the evolutionary tree was constructed by using the maximum likelihood (ML) method, with 1000 bootstraps. .

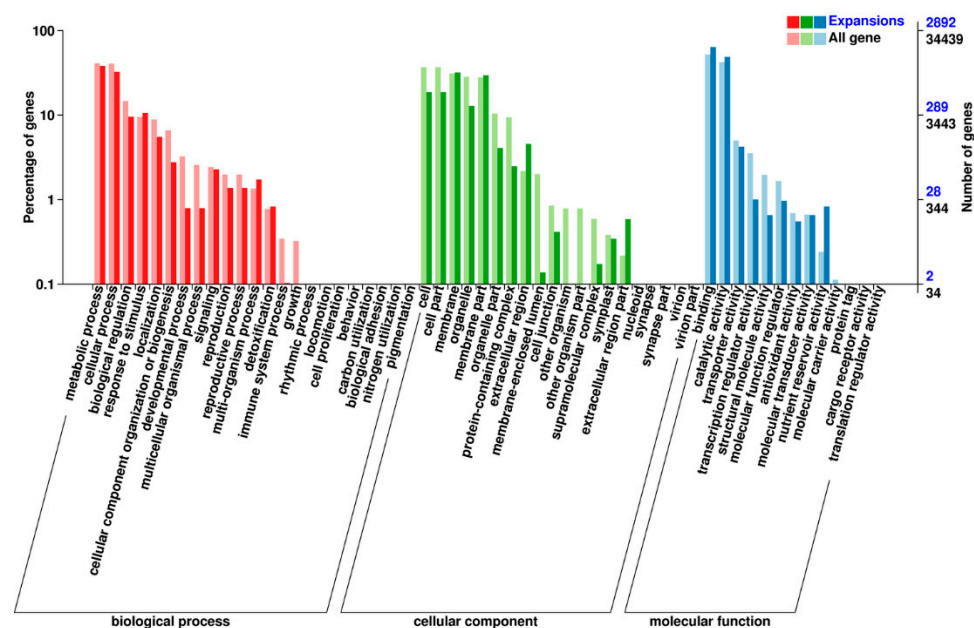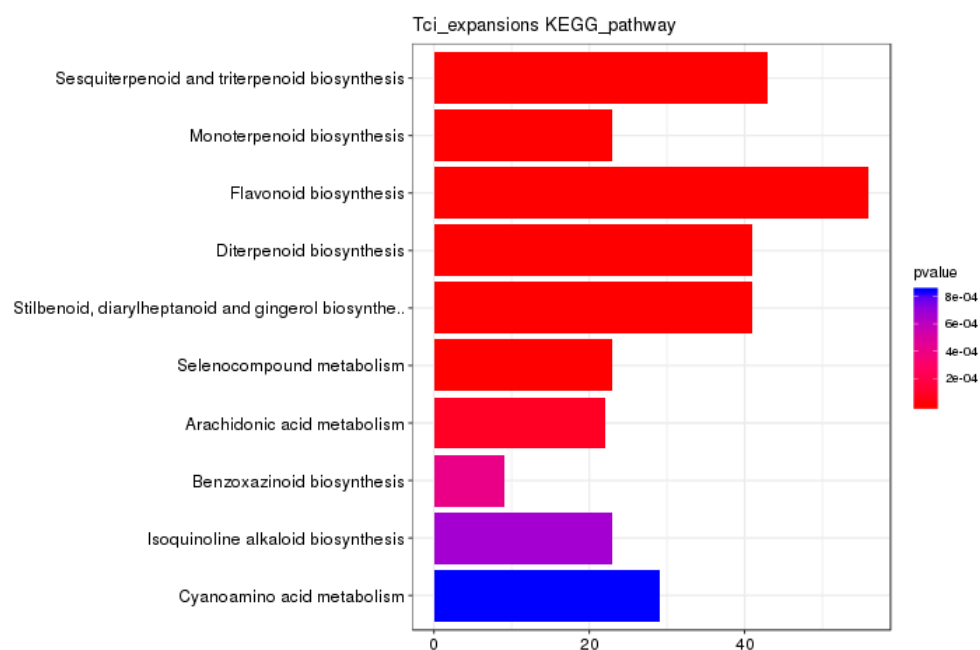

**Figure S2.** Go and KEGG analyses for expanded gene families in *T. ciliata*. The upper figure is GO enrichment analysis, showing the percentages of expanded gene families in three ontologies (biological process, cellular component and molecular function). The bottom figure is KEGG pathway analysis. The ordinate is the information of pathway and the abscissa in the bar chart is the number of genes. Ten pathways with the most significant enrichment (i.e., the lowest p-values) were selected for illustrations.

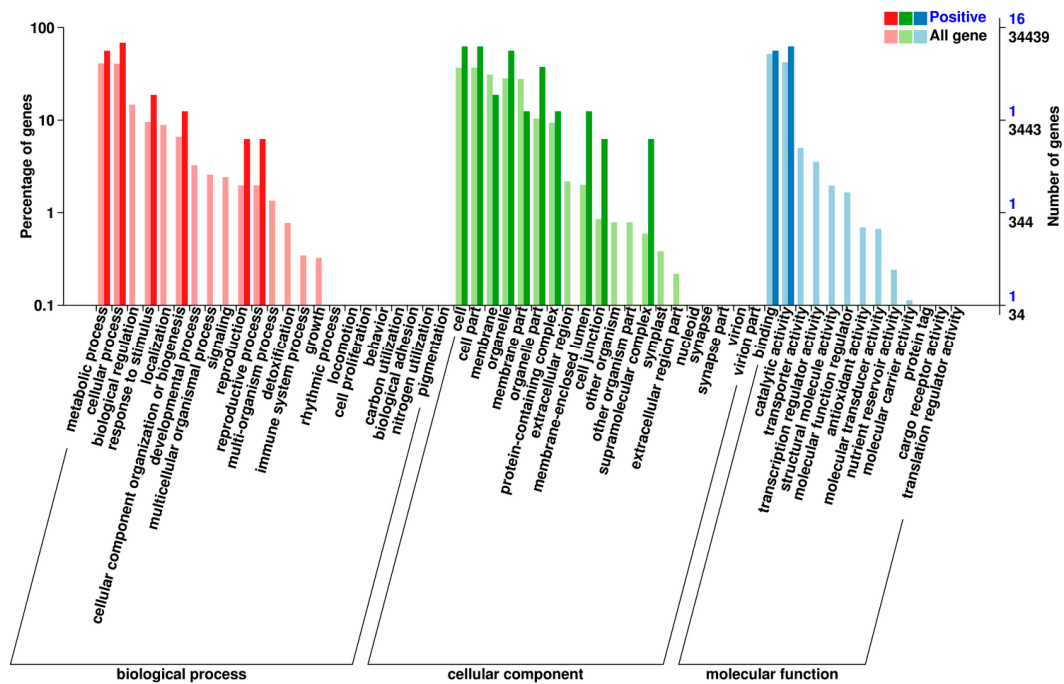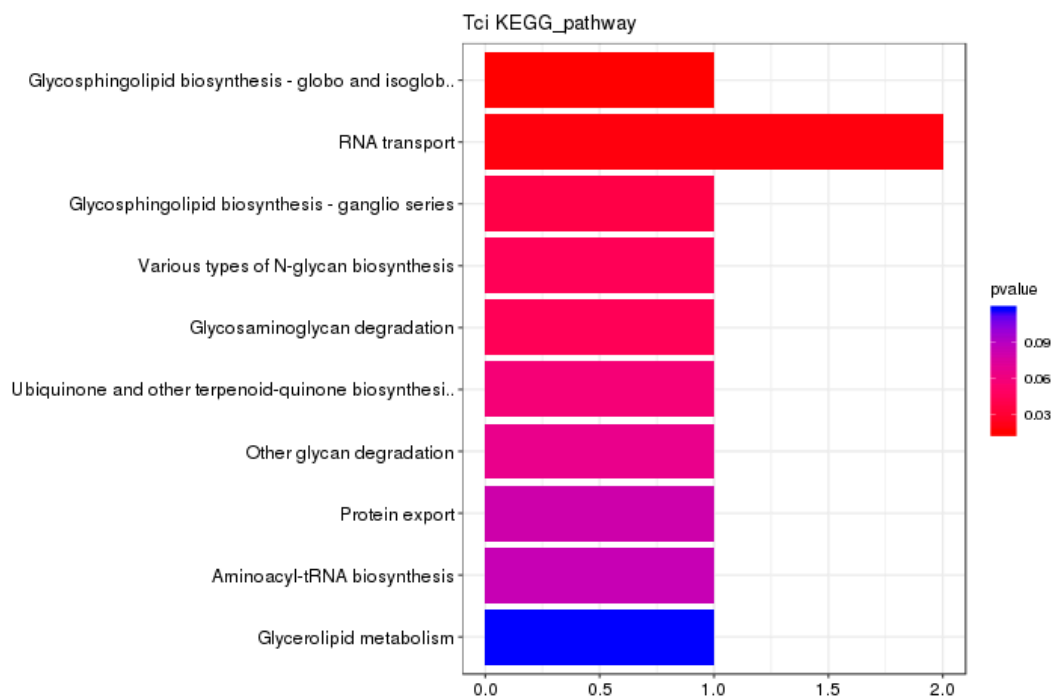

**Figure S3.** GO enrichment and KEGG pathway analyses of the genes under positive selection. Upper: In the biological processes, the genes with positive selection were mainly involved in metabolic process, cellular process, response to stimulus, cellular component organismal or biogenesis, reproduction and reproductive process. In terms of cellular component, these genes were involved in the components of cell and cell part, membrane and membrane part, organelle, protein-containing complex, membrane-enclosed lumen, cell junction, and supramolecular complex. In terms of molecular function, these genes were mainly involved in binding and catalytic function. Bottom: The ordinate is the information of KEGG pathway and the abscissa in the bar chart is the number of genes. Ten pathways with the most significant enrichment (i.e., the lowest p-values) were selected for illustrations.

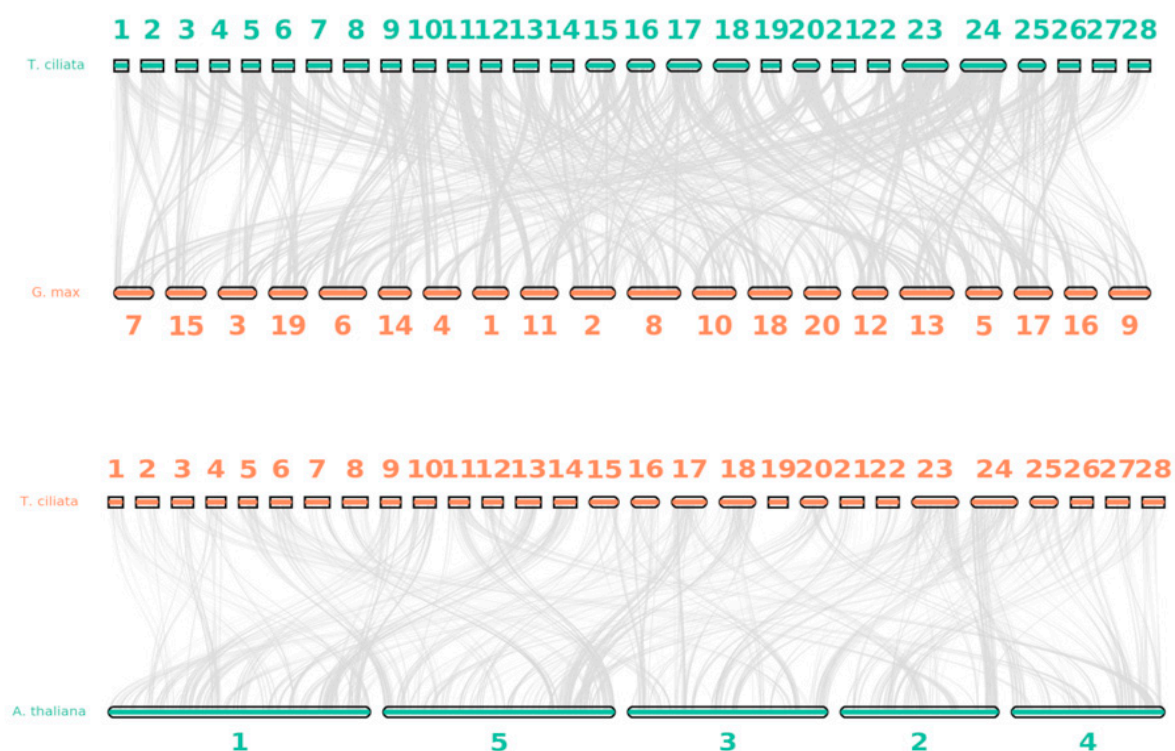

**Figure S4.** Chromosome collinearity analysis. The upper figure is the collinear relationship of *T. ciliata* against *G. max*, and the bottom figure is the collinear relationship of *T. ciliata* against *A. thaliana*.

**Table S1.** Websites and access numbers for downloading genome sequences of 11 plant species used in this study.

| Species                   | Website                                                                                                                                                   | Accession number      | Reference |
|---------------------------|-----------------------------------------------------------------------------------------------------------------------------------------------------------|-----------------------|-----------|
| <i>Citrus maxima</i>      | <a href="http://citrus.hzau.edu.cn/orange/download/HWB.chromosome.f.a.tar.gz">http://citrus.hzau.edu.cn/orange/download/HWB.chromosome.f.a.tar.gz</a>     | NCBI: GCA_002006925.1 | [6]       |
| <i>Populus tremula</i>    | <a href="http://128.192.158.63/index.php/databases/spta-717-genome">http://128.192.158.63/index.php/databases/spta-717-genome</a>                         | ENA: PRJEB23585       | [7]       |
| <i>Salix purpurea</i>     | <a href="https://phytozome-next.jgi.doe.gov/info/Spurpurea_v5_1">https://phytozome-next.jgi.doe.gov/info/Spurpurea_v5_1</a>                               | JGI                   | [8]       |
| <i>Eucalyptus grandis</i> | <a href="https://phytozome.jgi.doe.gov/pz/portal.html#!info?alias=Org_Egrandis">https://phytozome.jgi.doe.gov/pz/portal.html#!info?alias=Org_Egrandis</a> | NCBI: GCA_016545825.1 | [9]       |

|                             |                                                                                                                                                                           |                       |      |
|-----------------------------|---------------------------------------------------------------------------------------------------------------------------------------------------------------------------|-----------------------|------|
| <i>Amborella trichopoda</i> | <a href="https://phytozome.jgi.doe.gov/pz/portal.html">https://phytozome.jgi.doe.gov/pz/portal.html</a>                                                                   | NCBI: GCA_000471905.1 | [10] |
| <i>Prunus persica</i>       | <a href="http://genome.jgi.doe.gov/pages/dynamicOrganismDownload.jsf?organism=Ppersica">http://genome.jgi.doe.gov/pages/dynamicOrganismDownload.jsf?organism=Ppersica</a> | NCBI: GCA_000346465.2 | [11] |
| <i>Citrus reticulata</i>    | <a href="http://citrus.hzau.edu.cn/orange/download/index.php">http://citrus.hzau.edu.cn/orange/download/index.php</a>                                                     | NCBI: GCA_003258625.1 | [12] |
| <i>Arabidopsis thaliana</i> | <a href="ftp://ftp.ensemblgenomes.org/pub/plants/release-45/fasta/arabidopsis_thaliana">ftp://ftp.ensemblgenomes.org/pub/plants/release-45/fasta/arabidopsis_thaliana</a> | NCBI: GCA_000001735.2 | [13] |
| <i>Glycine max</i>          | <a href="https://phytozome.jgi.doe.gov/pz/portal.html#!info?alias=Org_Gmax">https://phytozome.jgi.doe.gov/pz/portal.html#!info?alias=Org_Gmax</a>                         | NCBI: GCA_000004515.5 | [14] |
| <i>Toona sinensis</i>       | <a href="https://db.cngb.org/search/project/CNP0000958/">https://db.cngb.org/search/project/CNP0000958/</a>                                                               | CNGB: CNP0000958      | [15] |
| <i>Toona ciliata</i>        | <a href="https://db.cngb.org/search/project/CNP0001985/">https://db.cngb.org/search/project/CNP0001985/</a>                                                               | CNGB: CNP0001985      | [16] |

**Table S2.** A list of expanded gene families in *T. ciliata* and its comparison with other 10 lant plant species.

| Orthogroup       | Ath | Atr | Cma | Cre | Egr | Gma | Pep | Ptr | Spu | Tci | Tsi | Total | AnnoGeneNum(PANTHER_ID) | PANTHER_Description                 |
|------------------|-----|-----|-----|-----|-----|-----|-----|-----|-----|-----|-----|-------|-------------------------|-------------------------------------|
| OG00000002[Tci+] | 21  | 0   | 22  | 38  | 0   | 1   | 5   | 1   | 4   | 36  | 0   | 128   | 128[PTHR23155:SF1044]   | OS12G0491200 PROTEIN                |
| OG00000004[Tci+] | 8   | 6   | 6   | 7   | 7   | 17  | 7   | 30  | 11  | 14  | 7   | 120   | 120[PTHR24068:SF346]    | BNAA01G32320D PROTEIN               |
| OG00000007[Tci+] | 2   | 0   | 21  | 25  | 1   | 0   | 8   | 24  | 9   | 20  | 0   | 110   | 110[PTHR31170:SF13]     | BNAC04G53230D PROTEIN               |
| OG00000009[Tci+] | 0   | 0   | 8   | 5   | 40  | 2   | 22  | 2   | 11  | 17  | 0   | 107   | 107[PTHR27005:SF367]    | SUBFAMILY NOT NAMED                 |
| OG00000011[Tci+] | 11  | 0   | 7   | 6   | 5   | 15  | 7   | 15  | 12  | 10  | 4   | 92    | 92[PTHR11426:SF198]     | SUBFAMILY NOT NAMED                 |
| OG00000013[Tci+] | 0   | 0   | 15  | 16  | 31  | 4   | 7   | 3   | 4   | 10  | 0   | 90    | 90[PTHR31225:SF111]     | TERPENE SYNTHASE 2-RELATED          |
| OG00000022[Tci+] | 0   | 0   | 1   | 2   | 6   | 1   | 6   | 22  | 35  | 7   | 0   | 80    | 80[PTHR32444:SF130]     | GLYCOPROTEIN S13, PUTATIVE-RELATED  |
| OG00000023[Tci+] | 0   | 0   | 18  | 24  | 0   | 0   | 11  | 6   | 4   | 15  | 0   | 78    | 78[PTHR48063:SF13]      | RECEPTOR-LIKE PROTEIN 12 ISOFORM X1 |
| OG00000027[Tci+] | 0   | 0   | 9   | 10  | 0   | 0   | 0   | 23  | 11  | 23  | 0   | 76    | 76[PTHR31170:SF9]       | PROTEIN, PUTATIVE (DUF247)-RELATED  |

**Table S3.** Summary of the genes and gene families of *T. ciliata* under positive selection detected using branch-site model.

| Gene         | Branch p-value | Sites                                                                                                                                                                                                                                                                                                                                                                                                         | Gene family |
|--------------|----------------|---------------------------------------------------------------------------------------------------------------------------------------------------------------------------------------------------------------------------------------------------------------------------------------------------------------------------------------------------------------------------------------------------------------|-------------|
| Tci0G012920  | 0.000001812    | 516,S,0.991** 517,F,0.994**                                                                                                                                                                                                                                                                                                                                                                                   | OG0010586   |
| Tci02G003970 | 0.009595759    | 203,M,0.999** 204,E,0.999**                                                                                                                                                                                                                                                                                                                                                                                   | OG0010741   |
| Tci26G007640 | 0.004636312    | 845,Q,0.987* 846,E,0.996**                                                                                                                                                                                                                                                                                                                                                                                    | OG0010779   |
| Tci25G015770 | 0.000001611    | 189,D,0.998** 191,L,0.976* 299,E,1.000** 301,E,0.995**                                                                                                                                                                                                                                                                                                                                                        | OG0011971   |
| Tci18G007370 | 0              | 270,E,0.990* 274,L,0.998** 277,R,0.983* 279,R,0.995** 283,L,1.000**<br>284,S,0.998** 288,E,0.997** 290,R,0.997** 291,R,0.993**                                                                                                                                                                                                                                                                                | OG0012039   |
| Tci26G008500 | 0.007148477    | 81,A,0.989*                                                                                                                                                                                                                                                                                                                                                                                                   | OG0012120   |
| Tci24G009130 | 0              | 791,S,0.995** 793,S,0.998** 794,L,0.994** 797,N,0.974* 804,R,0.995**<br>805,E,0.973* 807,A,0.999** 811,Q,0.999** 812,K,0.982* 813,E,0.999**                                                                                                                                                                                                                                                                   | OG0012180   |
| Tci24G012060 | 0              | 273,C,0.990** 276,A,0.988* 277,D,0.996**                                                                                                                                                                                                                                                                                                                                                                      | OG0012181   |
| Tci05G006200 | 0              | 221,A,0.991** 222,Y,0.989* 223,I,0.999** 224,T,0.992** 225,K,0.980*<br>226,N,1.000** 233,Q,0.997** 236,T,0.980* 245,Q,0.979*                                                                                                                                                                                                                                                                                  | OG0012339   |
| Tci16G006340 | 0              | 2,L,0.957* 8,Q,1.000** 9,M,0.989* 15,V,0.985* 17,L,0.973* 18,R,0.996**<br>148,R,0.997**                                                                                                                                                                                                                                                                                                                       | OG0012457   |
| Tci22G012170 | 0.008371652    | 837,K,0.992**                                                                                                                                                                                                                                                                                                                                                                                                 | OG0012509   |
| Tci03G000720 | 0              | 384,T,0.963* 395,D,0.996** 396,Q,0.999** 398,L,0.978* 400,A,0.997**<br>401,S,0.999** 402,S,0.997** 403,M,0.991** 408,W,0.999**                                                                                                                                                                                                                                                                                | OG0012568   |
| Tci08G010320 | 0              | 1568,Q,0.991** 1655,L,0.960* 1659,L,0.962* 1661,G,0.958* 1662,Y,0.988*                                                                                                                                                                                                                                                                                                                                        | OG0013415   |
| Tci28G008070 | 0.009422131    | 1307,K,0.951*                                                                                                                                                                                                                                                                                                                                                                                                 | OG0013543   |
| Tci16G002340 | 0.000000002    | 4,E,0.966* 6,H,0.997**                                                                                                                                                                                                                                                                                                                                                                                        | OG0013575   |
| Tci20G008110 | 0.000025704    | 2,E,0.997** 3,D,0.999**                                                                                                                                                                                                                                                                                                                                                                                       | OG0013722   |
| Tci25G014390 | 0              | 94,E,0.999** 96,A,0.998** 98,E,0.997** 431,G,0.999** 433,R,0.997**<br>434,E,0.999** 437,E,0.999** 439,H,0.999** 440,H,1.000** 442,V,0.999**<br>443,T,0.972* 447,V,0.999** 449,A,0.999** 450,A,0.999** 453,A,0.997**<br>456,Y,0.999** 457,I,0.973* 461,T,0.999** 463,R,0.984* 467,A,0.996**<br>470,K,0.999** 473,M,0.967* 474,E,1.000** 475,I,1.000** 673,T,0.958*<br>927,S,1.000** 953,M,0.961* 955,A,0.999** | OG0013759   |

|              |             |                                                                                                                                                           |           |
|--------------|-------------|-----------------------------------------------------------------------------------------------------------------------------------------------------------|-----------|
| Tci23G023080 | 0           | 166,C,0.970* 584,C,0.998** 585,L,0.980* 586,Q,0.962* 589,H,0.999**<br>591,F,0.999** 592,G,0.998** 593,K,0.999** 596,R,0.992**                             | OG0013832 |
| Tci20G014370 | 0.000403636 | 140,A,0.952* 179,D,0.999** 180,Y,0.999** 181,I,0.992** 182,H,0.999**<br>183,F,0.997** 189,A,1.000**                                                       | OG0013939 |
| Tci12G009830 | 0.007667313 | 3,S,0.968*<br>86,I,0.961* 217,I,0.959* 222,D,0.970* 224,N,0.999** 225,T,0.996**<br>227,C,0.973* 228,W,0.998** 229,T,0.999** 230,C,0.968* 231,L,0.954*     | OG0014682 |
| Tci10G010830 | 0           | 232,F,0.986* 235,Y,0.991** 237,K,0.996** 238,A,0.985* 242,I,0.990*<br>248,L,0.988* 249,G,0.981* 707,M,0.990** 796,R,0.997** 797,W,0.998**<br>798,G,0.967* | OG0014810 |
| Tci19G010360 | 0.000120128 | 25,N,0.990*                                                                                                                                               | OG0014915 |
| Tci22G004720 | 0.000000105 | 200,S,0.950* 452,D,1.000** 461,G,0.997** 462,E,0.999**                                                                                                    | OG0014969 |
| Tci11G009910 | 0.000000391 | 66,S,0.967* 101,P,0.987*                                                                                                                                  | OG0015668 |
| Tci04G011030 | 0.000006037 | 9,I,0.960* 12,R,0.989* 21,D,0.988*                                                                                                                        | OG0016558 |

\*: a significant level of greater than 0.95; \*\*: a significant level of greater than 0.99.

## References

1. Nguyen, L.T.; Schmidt, H.A.; Von Haeseler, A.; Minh, B.Q. IQ-TREE: A fast and effective stochastic algorithm for estimating maximum-likelihood phylogenies. *Mol. Biol. Evol.* **2015**, *32*, 268–274. <https://doi.org/10.1093/molbev/msu300>.
2. Katoh, K.; Asimenos, G.; Toh, H. Multiple alignment of DNA sequences with MAFFT. *Methods Mol. Biol.* **2009**, *537*, 39–64. [https://doi.org/10.1007/978-1-59745-251-9\\_3](https://doi.org/10.1007/978-1-59745-251-9_3).
3. Suyama, M.; Torrents, D.; Bork, P. PAL2NAL: Robust conversion of protein sequence alignments into the corresponding codon alignments. *Nucleic Acids Res.* **2006**, *34* (Suppl 2), W609–W612. <https://doi.org/10.1093/nar/gkl315>.
4. Talavera, G.; Castresana, J. Improvement of phylogenies after removing divergent and ambiguously aligned blocks from protein sequence alignments. *Syst. Biol.* **2007**, *56*, 564–577. <https://doi.org/10.1080/10635150701472164>.
5. Kalyaanamoorthy, S.; Minh, B.Q.; Wong, T.K.; Haeseler, V.A.; Jermiin, L.S. ModelFinder: Fast model selection for accurate phylogenetic estimates. *Nat. Methods* **2017**, *14*, 587. <https://doi.org/10.1038/nmeth.4285>.
6. Wang, X.; Xu, Y.; Zhang, S.; Cao, L.; Huang, Y.; Cheng, J.; Wu, G.; Tian, S.; Chen, C.; Liu, Y.; et al. Genomic analyses of primitive, wild and cultivated citrus provide insights into asexual reproduction. *Nat. Genet.* **2017**, *49*(5), 765–772. <https://doi.org/10.1038/ng.3839>.
7. Lin, Y.C.; Wang, J.; Delhomme, N.; Schiffthaler, B.; Sundström, G.; Zuccolo, A.; Nystedt, B.; Hvidsten, T.R.; de la Torre, A.; Cossu, R.M.; et al. Functional and evolutionary genomic inferences in *Populus* through genome and population sequencing of American and European aspen. *Proc. Natl. Acad. Sci. U.S.A.* **2018**, *115*(46), E10970–E10978. <https://doi.org/10.1073/pnas.1801437115>.
8. Zhou, R.; Macaya-Sanz, D.; Carlson, C.H.; Schmutz, J.; Jenkins, J.W.; Kudrna, D.; Sharma, A.; Sandor, L.; Shu, S.; Barry, K.; et al. A willow sex chromosome reveals convergent evolution of complex palindromic repeats. *Genome Biol.* **2020**, *21*(1), 38. <https://doi.org/10.1186/s13059-020-1952-4>.
9. Bartholomé, J.; Mandrou, E.; Mabiala, A.; Jenkins, J.; Nabihoudine, I.; Klopp, C.; Schmutz, J.; Plomion, C.; Gion, J.-M. High-resolution genetic maps of *Eucalyptus* improve *Eucalyptus grandis* genome assembly. *New Phytol.* **2015**, *206*(4), 1283–1296. <https://doi.org/10.1111/nph.13150>.
10. Amborella Genome Project. The *Amborella* genome and the evolution of flowering plants. *Science* **2013**, *342*(6165), 1241089. doi:10.1126/science.1241089.



11. International Peach Genome Initiative; Verde, I.; Abbott, A.G.; Scalabrin, S.; Jung, S.; Shu, S.; Marroni, F.; Zhebentyayeva, T.; Dettori, M.T.; Grimwood, J.; et al. The high-quality draft genome of peach (*Prunus persica*) identifies unique patterns of genetic diversity, domestication and genome evolution. *Nat. Genet.* **2013**, *45*(5), 487–494. <https://doi.org/10.1038/ng.2586>.
12. Wang, L.; He, F.; Huang, Y.; He, J.; Yang, S.; Zeng, J.; Deng, C.; Jiang, X.; Fang, Y.; Wen, S.; et al. Genome of wild mandarin and domestication history of mandarin. *Mol. Plant* **2018**, *11*(8), 1024–1037. <https://doi.org/10.1016/j.molp.2018.06.001>.
13. Sloan, D.B.; Wu, Z.; Sharbrough, J. Correction of persistent errors in Arabidopsis reference mitochondrial genomes. *Plant Cell* **2018**, *30*(3), 525–527. doi:10.1105/tpc.18.00024.
14. Schmutz, J.; Cannon, S.B.; Schlueter, J.; Ma, J.; Mitros, T.; Nelson, W.; Hyten, D.L.; Song, Q.; Thelen, J.J.; Cheng, J.; et al. Genome sequence of the palaeopolyploid soybean. *Nature* **2010**, *463*(7278), 178–183. <https://doi.org/10.1038/nature08670>.
15. Ji, Y.-T.; Xiu, Z.-H.; Chen, C.-H.; Wang, Y.; Yang, J.-X.; Sui, J.-J.; Jiang, S.-J.; Wang, P.; Yue, S.-Y.; Zhang, Q.-Q.; et al. Long read sequencing of *Toona sinensis* (A. Juss) Roem: A chromosome-level reference genome for the family Meliaceae. *Mol. Ecol. Resour.* **2021**, *21*, 1243–1255. <https://doi.org/10.1111/1755-0998.13318>.
16. Wang, X.; Xiao, Y.; He, Z.H.; Li, L.L.; Song, H.Y.; Zhang, J.J.; Cheng, X.; Chen, X.Y.; Li, P.; Hu, X.S. A chromosome-level genome assembly of *Toona ciliata* (Meliaceae). *Genome Biol. Evol.* **2022**, *14*, evac121. <https://doi.org/10.1093/gbe/evac121>.
